# Supplementary material for: Bioinspired supramolecular fibers for mercury ion adsorption
Source: Royal Society of Chemistry journal article supplement (doi:10.1039/c3ta11072a), 2013-01-01
Supplement: c3ta11072a.pdf [file c3ta11072a.pdf]

## Supporting Information

### Bioinspired Supramolecular Fibers for Mercury Ions Adsorption

Yeh-Sheng Wang,<sup>b</sup> Chih-Chia Cheng<sup>b\*</sup>, Jem-Kun Chen<sup>d</sup>, Fu-Hsiang Ko<sup>e</sup> and Feng-Chih Chang<sup>a,b,c\*</sup>

- Department of Materials and Optoelectronic Science, National Sun Yat-Sen University, Kaohsiung 80424, Taiwan
- Institute of Applied Chemistry, National Chiao Tung University, Hsinchu 30050, Taiwan
- R&D Center for Membrane Technology, Chung Yuan Christian University, Chungli, Taoyuan 32043, Taiwan
- Department of Materials Science and Engineering, National Taiwan University of Science and Technology, Taipei 10607, Taiwan
- Department of Materials Science and Engineering, National Chiao-Tung University, Hsinchu 30050, Taiwan

\*To whom correspondence should be addressed E-mail: [changfc1973@gmail.com](mailto:changfc1973@gmail.com) and [chih-chia.ac95g@nctu.edu.tw](mailto:chih-chia.ac95g@nctu.edu.tw)

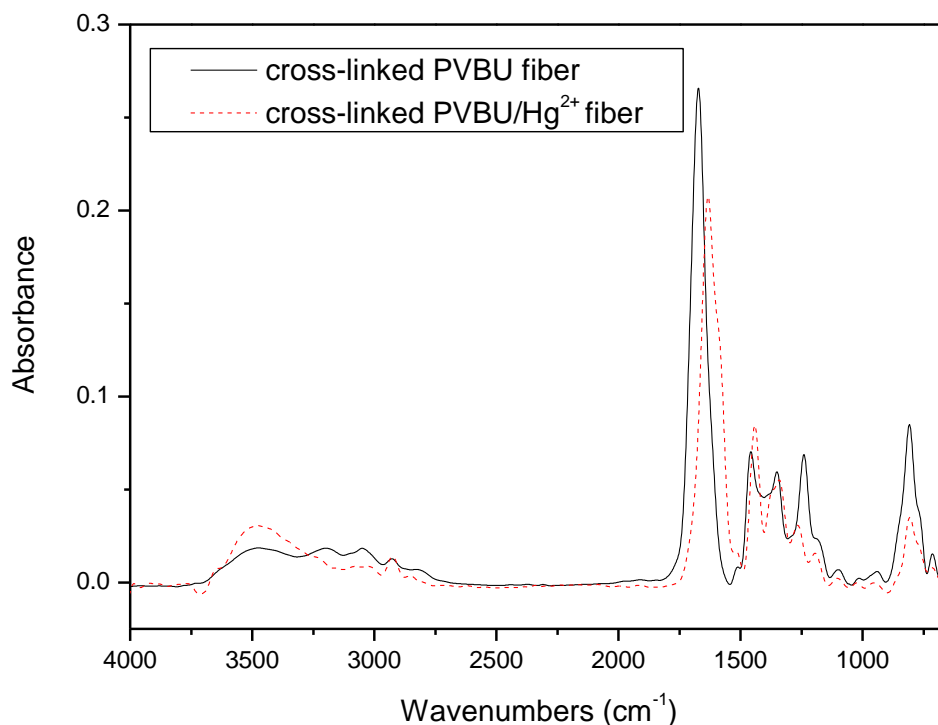

**Figure S1.** FT-IR spectra of cross-linked PVBU fiber and cross-linked PVBU/Hg<sup>2+</sup> fiber

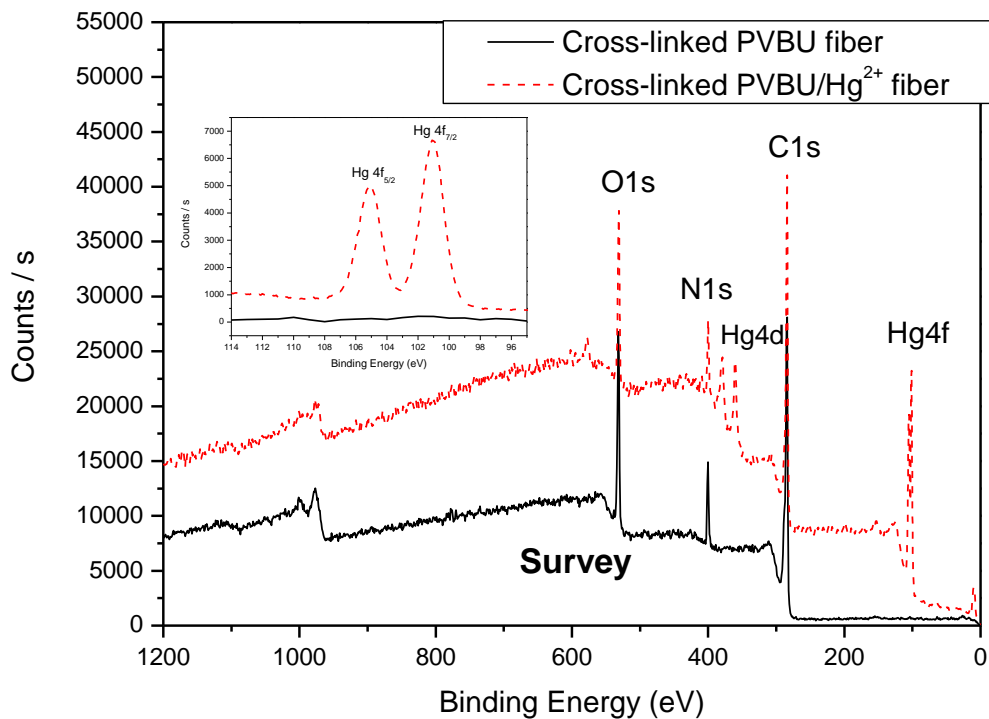

**Figure S2.** XPS spectra of cross-linked PVBU fiber and cross-linked PVBU/Hg<sup>2+</sup> fiber

**Table S1** Atom Ratio of complex cross-linked PVBU/Hg<sup>2+</sup> fiber

|      | Peak (eV) | Area (CPS*eV) | Corrected RSF | Atomic (%) |
|------|-----------|---------------|---------------|------------|
| Hg4f | 101.0     | 19792         | 461.6         | 2.6        |
| N1s  | 399.6     | 4356          | 26.8          | 9.9        |
| O1s  | 531.0     | 9354          | 39.5          | 14.4       |
| C1s  | 283.9     | 20173         | 16.8          | 73.1       |

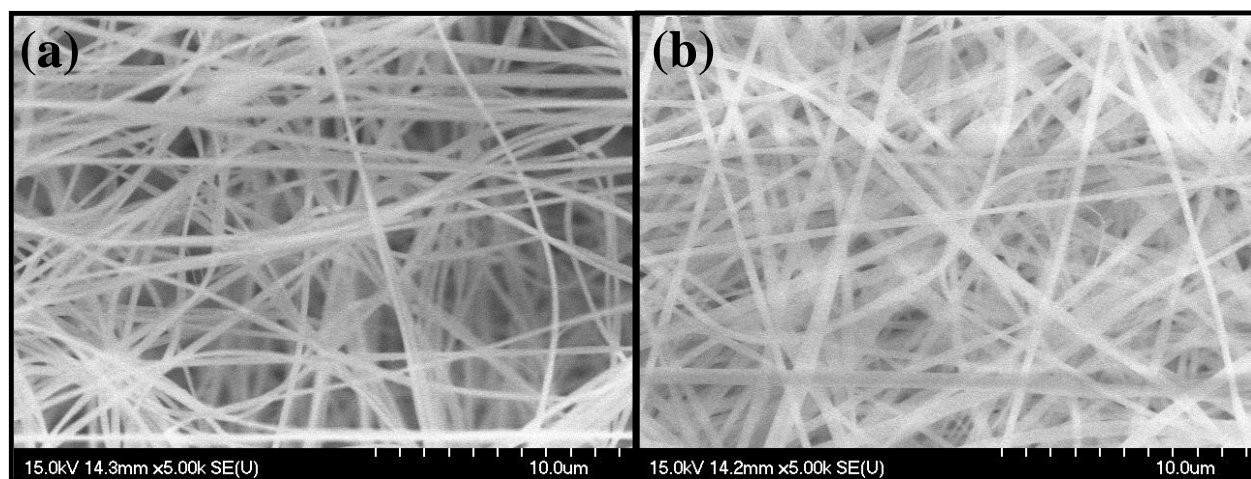

**Figure S3.** FE-SEM images of (a) PVBU fiber after adsorbing Hg<sup>2+</sup> (b) cross-linked PVBU fiber after adsorbing Hg<sup>2+</sup>

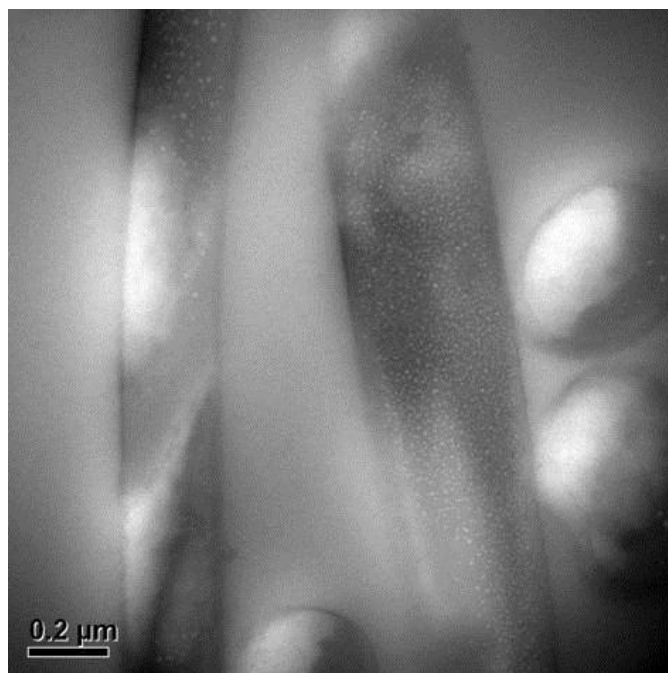

**Figure S4.** TEM image of cross-linked PVBU/Hg<sup>2+</sup> fiber

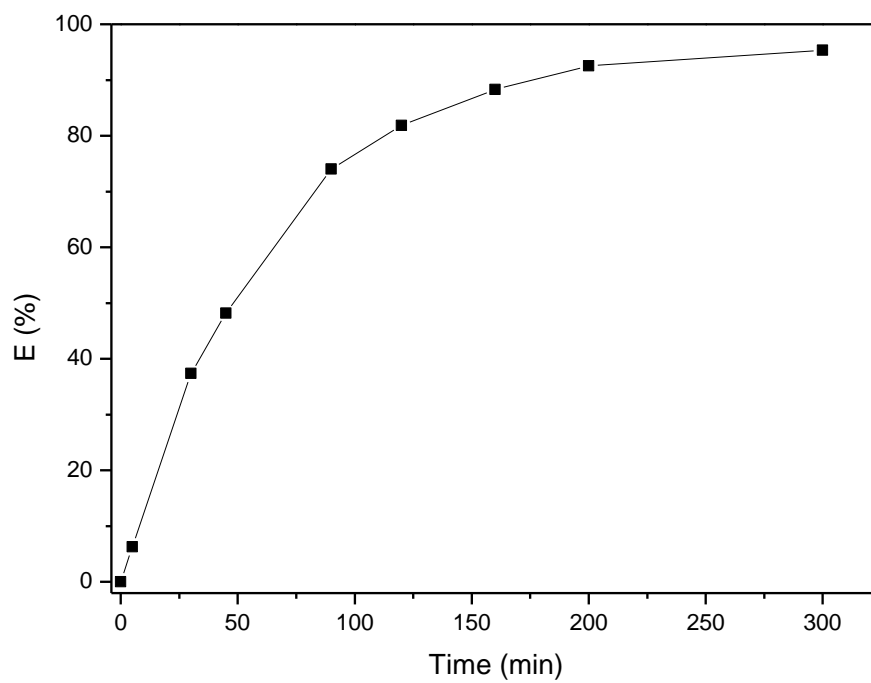

**Figure S5.** Adsorption kinetic of PVBU fiber for Hg<sup>2+</sup>
